# Supplementary material
Source: PubMed Central journal article supplement (PMC5173460)

1  
2  
3  
4  
5 Hormonal contraception approval in Canada, the United States and  
6 the United Kingdom  
7

8 Troskie C<sup>1,2</sup>, Goktepe O<sup>2</sup> MSc, Soon JA<sup>1,2</sup> RPharm, PhD, Norman WV<sup>2,3</sup> \*  
9 MD, MHSc  
10

11 <sup>1</sup>Faculty of Pharmaceutical Sciences, University of British  
12 Columbia, Vancouver, BC, V6T 1Z3.

13 <sup>2</sup>Contraception Access Research Team, Women's Health Research  
14 Institute, University of British Columbia.

15 <sup>3</sup>Dept of Family Practice, Faculty of Medicine, University of  
16 British Columbia  
17

18  
19  
20 Abbreviated title: Regulatory approval of contraceptives in 3  
21 countries  
22

23  
24 Key words: Contraception; Drug approval; Canada; United States;  
25 United Kingdom; Pregnancy, Unplanned  
26

27  
28  
29 \*Author to whom correspondence should be addressed:

30 Wendy V. Norman

31 Department of Family Practice, University of British Columbia

32 320-5950 University Boulevard,

33 Vancouver, British Columbia, Canada V6Z 1T3

34 [wendy.norman@ubc.ca](mailto:wendy.norman@ubc.ca)  
35  
36  
37  
38  
39  
40  
41  
42  
43  
44  
45  
46  
47  
48  
49  
50  
51  
52  
53  
54  
55  
56  
57  
58  
59  
60

## Regulatory Approval of Contraceptives

1  
2  
3 Number of words (text): 2382  
4

5 Number of words (abstract):250  
6

7 Number of tables: 2  
8

9 Number of figures:4  
10  
11

12  
13 **Funding:** CT was supported throughout this study by a Graduate  
14 Student Scholarship award from the Canadian Institutes of Health  
15 Research-Public Health Agency of Canada Chair in Family Planning  
16 Public Health Research (Funding Reference Number: CPP 137903 ).  
17 Infrastructure support was provided to the Contraception Access  
18 Research Team by the Women's Health Research Institute of the BC  
19 Women's Hospital and Health Centre.  
20

21  
22 **Authors' Contributions:** WN conceived and designed the study with  
23 elements and revisions contributed by all authors. CT undertook  
24 data acquisition and initial analyses with assistance from JS and  
25 WN. OG provided statistical support for the analyses. CT wrote  
26 the initial draft and all authors contributed to revisions and  
27 accepted the final manuscript.  
28

29 **Declaration of Conflict of Interest:** All authors declare we have  
30 no conflict of interest with respect to this research. WN and JS  
31 conduct an investigator-initiated randomized controlled trial to  
32 which Bayer Canada Inc. has donated contraceptive devices.  
33  
34  
35  
36  
37  
38  
39  
40  
41  
42  
43  
44  
45  
46  
47  
48  
49  
50  
51  
52  
53  
54  
55  
56  
57  
58  
59  
60

## Regulatory Approval of Contraceptives

**Abstract**

**OBJECTIVE:** To determine discrepancies in contraception regulatory approval between Health Canada (HC), the United States (USA) Food and Drug Administration (FDA), and the United Kingdom (UK) Medicines and Healthcare Products Regulatory Agency (MHRA).

**METHODS:** We obtained hormonal contraceptive application submission and approval dates for HC, FDA and MHRA for methods approved from Jan 2000–Jan 2015, as well as data from other agencies for drugs approved by HC during this period, through public data sources and direct correspondence with the regulatory agencies.

**RESULTS:** During the study period 16 contraceptives were approved in Canada, compared to 25 in the USA and 12 in the UK. All applications were submitted to the UK or USA prior to Canada, where applications were submitted 733 (SD557, USA), and 949 (SD940, UK) days later. Mean days to approval in Canada was significantly longer (754, SD502) than in the USA (504, SD257,  $p=0.04$ ) and UK (392, SD233,  $p=0.02$ ). No contraceptive implants have been approved in Canada.

**CONCLUSION:** Between 2000 and 2015, applications for hormonal contraceptive approval were consistently submitted later to Canadian, than to USA or UK regulators. HC approved fewer contraceptives than the FDA, and took longer to do so than the USA or UK regulators. Transparency was poor, with no information available on unsuccessful applications. Canadian women wait longer and have fewer options, including no access to implants, one of the two most effective reversible contraceptives. Review

Regulatory Approval of Contraceptives

1  
2  
3  
4  
5  
6  
7  
8  
9  
10  
11  
12  
13  
14  
15  
16  
17  
18  
19  
20  
21  
22  
23  
24  
25  
26  
27  
28  
29  
30  
31  
32  
33  
34  
35  
36  
37  
38  
39  
40  
41  
42  
43  
44  
45  
46  
47  
48  
49  
50  
51  
52  
53  
54  
55  
56  
57  
58  
59  
60

of Canadian federal regulatory policies and procedures has the potential to improve prevention of unintended pregnancy in Canada.

Confidential

## Regulatory Approval of Contraceptives

### INTRODUCTION

The existence of differences in the availability of hormonal contraceptives between Canada and other western countries had been demonstrated in the 1990's, but no recent evaluation is available [1]. Azzarello et al. (2004) found that up until the year 2000, Canadian women had access to fewer hormonal contraceptive options compared to the United States (USA) and United Kingdom (UK). Downing et al. (2012) noted that the overall drug approval process through Health Canada (HC) required more time when compared to similar approval in the USA and UK [2]. Researchers have also compared the overall access of new drugs in Canada to access in the USA and European Union (EU). The delay in submission to the national drug regulatory agency by the pharmaceutical companies, when compared between Canada's HC, the Food and Drug Administration (FDA) of the USA and the European Medicines Agency (EMA) was greater than the delay due to the approval process [3], compounding the delayed access to pharmaceuticals for Canadians.

Hormonal contraceptives are an effective method of pregnancy prevention [4-7]. In particular, long acting reversible contraception (LARC), including both intrauterine methods and sub-dermal implant methods, are the most effective non-permanent methods to prevent unintended pregnancy and thus support women to time and space their pregnancies [4,8-11]. Currently, hormonal contraceptives are available to use via several routes of administration: oral, vaginal, transdermal, injection, dermal patch, intrauterine or sub-dermal implants [12]. Hormonal

## Regulatory Approval of Contraceptives

1  
2  
3 contraceptives are available with varying amounts of estrogen,  
4 and with alternative types and amounts of progestin. Having a  
5 range of available contraceptive choices, including variations in  
6 both route of administration and hormonal mix and dosage, allows  
7 women to select methods that best fit their individual  
8 requirements [13-15]. Contraceptives that more closely align with  
9 individual needs are more likely to be used [16-18]. In  
10 particular "set and forget" LARC methods have been exceptionally  
11 effective in reducing the consequences of unintended pregnancy  
12 [4, 8-11].

13  
14 In 2005, 31% of Canadian women completing their  
15 reproductive years had experienced at least one abortion [19].  
16 Similarly 30% of American women have at least one abortion during  
17 their lives and only just over half of pregnancies among women in  
18 the UK are intended [20-21]. As unintended pregnancy is common,  
19 women benefit when timely access to suitable contraceptive  
20 methods is available [19,22]. Hormonal contraceptives are  
21 convenient and effective resources allowing women to plan and  
22 space pregnancies [15-17]. As such, the timely approval of a full  
23 range of hormonal contraceptive methods is important to assist  
24 women and their families to meet their reproductive goals.

25  
26 We explored the regulatory approval times of new hormonal  
27 contraceptives by HC since the year 2000, and compared these to  
28 similar approval times by the FDA in the USA, and the EMA in  
29 Europe. However, as the EMA has approved very few contraceptives  
30 we chose a single European country as a comparator, using data  
31 from submissions and approvals for the MHRA of the UK. In this  
32  
33  
34  
35  
36  
37  
38  
39  
40  
41  
42  
43  
44  
45  
46  
47  
48  
49  
50  
51  
52  
53  
54  
55  
56  
57  
58  
59  
60

## Regulatory Approval of Contraceptives

1  
2  
3 way we aimed to provide an updated analysis on the comparative  
4 submission and approval timelines for hormonal contraceptives in  
5 Canada, the USA and the UK.  
6  
7  
8  
9

### **MATERIALS AND METHODS**

10  
11  
12 We collected data for this observational study from HC,  
13 the FDA, and MHRA. We included all available data related to any  
14 application to each of these agencies for any hormonal  
15 contraceptive medication that was approved between January 2000  
16 and January 2015. We included all routes of delivery for hormonal  
17 contraception: oral tablets, dermal patches, intravaginal rings,  
18 intrauterine delivery systems, and subdermal implants (if any).  
19 We excluded approvals for generic versions of previously approved  
20 drugs. Two specific products were approved after January 2000 in  
21 Canada but received prior approval elsewhere. Thus we included  
22 relevant data dating from 1998 from the UK and USA on the  
23 submission and approval times of these two products.  
24  
25  
26  
27  
28  
29  
30  
31  
32  
33  
34  
35  
36  
37

38 The HC Drug Product Online Database [12] provided the dates  
39 for final approval in Canada, whereas the HC Notice of Compliance  
40 Online Database [23] and the HC Drugs, Health Products Patent  
41 Register [24] provided the application dates for contraceptives.  
42 We used the HC Health Products and Food Branch Performance  
43 Reports for 2004 [25], 2005 [26], 2006-07 [27] and the Drug  
44 Submission Performance Annual Reports for Therapeutic Products  
45 [28-9] to cross check application and approval dates when  
46 possible. Correspondence with the HC Office of Submissions and  
47 Intellectual Property provided approval dates for applications  
48  
49  
50  
51  
52  
53  
54  
55  
56  
57  
58  
59  
60

## Regulatory Approval of Contraceptives

1  
2  
3 not available from the above-mentioned HC sources. We were not  
4  
5 able to access any information related to applications for  
6  
7 contraceptives that may have been submitted to HC but not  
8  
9 approved.  
10

11 For contraceptives approved in USA, we accessed application  
12 and approval dates through the FDA Approved Drug Products  
13 Database [30]. For some of the contraceptives available, the FDA  
14 Approved Drug Products Database did not list complete data  
15 including both application and approval dates. We corresponded  
16 with the FDA Division of Drug Information to complete the data.  
17  
18  
19  
20  
21  
22  
23

24 Due to the different paths to drug approval in the European  
25 Union (EU), we searched several databases for contraceptive  
26 availability in Europe. Few contraceptives were approved through  
27 the European Medicines Agency (EMA) [31], while the majority of  
28 the contraceptives were approved through the MHRA [32].  
29  
30 Consequently, we focussed on the approval process in the UK. We  
31 found additional information in the Drug Information Handbook  
32 [33] on the drug approval process in the UK. On the MHRA website,  
33 we retrieved Patient Information Leaflet (PIL) and Summaries of  
34 Product Characteristics (SPC), for contraceptives available in  
35 the UK [34], as well as final approval dates for several  
36 contraceptives. Subsequently, some of these approval dates were  
37 confirmed through the MHRA Public Assessment Reports [35]. For  
38 information on contraceptives that were not available on the MHRA  
39 website, correspondence with the Information Management Division  
40 of MHRA provided the remaining application and approval dates.  
41  
42  
43  
44  
45  
46  
47  
48  
49  
50  
51  
52  
53  
54  
55  
56  
57  
58  
59  
60



## Regulatory Approval of Contraceptives

1  
2  
3  
4  
5  
6  
7  
8  
9  
10  
11  
12  
13  
14  
15  
16  
17  
18  
19  
20  
21  
22  
23  
24  
25  
26  
27  
28  
29  
30  
31  
32  
33  
34  
35  
36  
37  
38  
39  
40  
41  
42  
43  
44  
45  
46  
47  
48  
49  
50  
51  
52  
53  
54  
55  
56  
57  
58  
59  
60

Additional and confirmatory information on contraceptive availability in Canada, the USA, and the UK were acquired through the International Planned Parenthood Hormonal Contraceptives Directory [36]. Data published in the literature [1] was used to confirm contraceptives approved prior to 2002. The Lexicomp Drug Information Handbook provided an additional complete list of contraceptives available in Canada and the USA [37].

### Analysis

Initial hormonal contraceptive application submission dates were compared using mean and standard deviation of the difference in days between the dates of submission of individual drugs to each successive national regulator.

Time to approval was defined as the number of days between submission date and approval date for each drug for Canada, USA and UK. Two drugs approved after 2000 in Canada had been approved prior to 2000 in the UK or the USA, thus for purposes of comparison, the approval dates in USA or UK prior to 2000 for these specific drugs was included. We examined the approval times for novel and non-novel pharmaceuticals both together and separately. We defined a hormonal contraceptive as novel when the product involved either a new active ingredient, such as a new type of progestin, or a new drug delivery system, such as an intravaginal ring. One-way Analysis of Variance (ANOVA) test was used to compare the means of drug approval times between USA, UK and Canada as well as to compare the means days between novel and non-novel drugs. All novel drugs were further reviewed between

## Regulatory Approval of Contraceptives

1  
2  
3 countries and their approval years were examined. We stratified  
4  
5 the years of approval dates into three intervals of 1998–2004,  
6  
7 2005–2010 and 2011–2015 to compare whether the approval times  
8  
9 showed any differences between the three cohorts (early, mid and  
10  
11 late) with the study period.  
12

13 All statistical analyses were done in R version 3.1.2.  
14  
15

**RESULTS**

16  
17  
18  
19 Between January 2000 and January 2015 we found that 16  
20  
21 contraceptives were approved in Canada, 12 were approved in the  
22  
23 UK, and 25 were approved in the USA. Additionally, among the  
24  
25 contraceptives approved in Canada after January 2000, an  
26  
27 emergency contraceptive had been approved in the USA and UK in  
28  
29 1999, and a levonorgestrel intrauterine system had been approved  
30  
31 in the UK in 1998, so that our submission and approval date  
32  
33 calculations include 16 contraceptives in Canada comparing to 26  
34  
35 in the USA and 14 in the UK and encompass 29 distinct hormonal  
36  
37 contraceptives in total.  
38  
39

40 The overall initial application submission dates were  
41  
42 compared between Canada, USA and the UK for equivalent  
43  
44 contraceptives. During this interval 16 drugs were submitted to  
45  
46 at least two countries, although none of the applications in this  
47  
48 period were submitted initially to Canada. In 12 out of 16 cases,  
49  
50 applications were first submitted to the USA, and 3 were first  
51  
52 submitted to the UK.  
53  
54

55 For the drugs submitted to the USA first, submission to  
56  
57 Canada occurred an average of 733 days (N=12, SD 557, range= 83–  
58  
59  
60

## Regulatory Approval of Contraceptives

1  
2  
3 1552) later. For the drugs submitted to the UK first, submission  
4  
5 to Canada was 949 days (N=4, SD 940, range=135-1977) later. When  
6  
7 the UK and USA application dates were combined, submission to  
8  
9 Canada occurred an average of 773 days later (N=16, SD 611,  
10  
11 range=83-1977).  
12  
13

14  
15 We defined "time to approval" as the number of days between  
16  
17 initial application and final approval. Time to approval (Table  
18  
19 1) in Canada was significantly longer (754, SD 502) than in the  
20  
21 USA (504, SD 257,  $p=0.04$ ) and UK (392, SD 233,  $p=0.02$ ). Canada's  
22  
23 approval times (Figure 1) were significantly different than UK-  
24  
25 USA combined ( $p=0.006$ ). The distribution of time to approval is  
26  
27 shown in Figure 2.  
28  
29

30  
31 Eight of the twenty-nine drugs are novel drugs and their  
32  
33 approval times were investigated separately. Table 2 shows each  
34  
35 novel drug by country and time to approval. Canada's time to  
36  
37 approval for novel drugs generally required a year and a half to  
38  
39 two years (range 452 to 775 days) with the exception of over six  
40  
41 years (1926 days) in the cases of one combined hormonal oral  
42  
43 contraceptive. Sub-dermal etonorgestrel implant contraception  
44  
45 (Implanon®) was associated with the largest difference in time to  
46  
47 approval between UK (78 days) and USA (1021 days), and this  
48  
49 method has not yet been approved in Canada. For levonorgestrel-  
50  
51 releasing intrauterine contraception, Health Canada approval  
52  
53 required substantially longer (709 days) compared to UK (58 days)  
54  
55 and USA (310 days). In contrast, time to approval for new  
56  
57 administration formats of approved agents (combined hormonal  
58  
59

## Regulatory Approval of Contraceptives

1  
2  
3 contraceptive vaginal ring, patch and oral tablets packaged for  
4 three months of continuous use) were similar across each country.  
5

6  
7 As shown in Figure 3 and Table 1, novel drug approval times  
8 did not show any difference when compared to non-novel drugs  
9 (p=0.94).  
10  
11

12  
13 Approval year cohorts examining three intervals, did not  
14 show any overall difference in the mean time to approval (p=0.90)  
15 between the early, mid or late cohorts of years within the study  
16 time frame. Canada demonstrates no improvement in time to  
17 approval across the three time cohorts (Figure 4). In contrast,  
18 contraceptive approvals in the UK have taken longer more  
19 recently, while approvals in the USA have occurred more rapidly.  
20  
21  
22  
23  
24  
25  
26  
27  
28  
29  
30

**DISCUSSION**

31  
32 Applications for approval of hormonal contraceptive methods  
33 were consistently submitted more than two years later to Canada  
34 for methods approved between 2000 and 2015, compared to  
35 submissions for approval of the same medication to either the UK  
36 or the USA. Once the application was submitted, Health Canada  
37 required 50% more time to approve contraceptives than the FDA in  
38 the USA, and nearly twice as long as did the MHRA in the UK.  
39 Health Canada approved 64% of the number of hormonal  
40 contraceptives approved by the FDA, and only just over half (55%)  
41 of all agents approved by any of the three jurisdictions during  
42 the study interval. The UK had fewer contraceptives approved in  
43 this interval than Canada (12 vs. 16), however sub-dermal  
44 etonorgestrel implant (one of only two types of highly effective  
45  
46  
47  
48  
49  
50  
51  
52  
53  
54  
55  
56  
57  
58  
59  
60

## Regulatory Approval of Contraceptives

1  
2  
3 LARC method) was approved in both the UK and the USA, yet not in  
4  
5 Canada. This is relevant as internationally contraceptive sub-  
6  
7 dermal implants have been shown to have a significant positive  
8  
9 effect on population health and the reduction of unintended  
10  
11 pregnancy, abortion, and adverse neonatal outcomes particularly  
12  
13 among vulnerable populations such as teenagers and low income  
14  
15 families [4, 8-11, 16-18, 38-41]  
16

17  
18 We were unable to locate information on applications that  
19  
20 may have been submitted to Health Canada but were not approved  
21  
22 [12, 42]. Thus, it is not possible to understand whether any  
23  
24 application for approval of a contraceptive sub-dermal implant  
25  
26 has been made to Health Canada, or if an application had been  
27  
28 assessed but not approved.  
29

30  
31 Due to the lack of publicly available data on the health  
32  
33 product regulatory agency websites or in publications, direct  
34  
35 correspondence with the agencies was required to collect data on  
36  
37 all hormonal contraception applications. Thus, a potential for  
38  
39 bias may be introduced through the reliance on agency employees  
40  
41 to report the application and approval times. However, we  
42  
43 consider that the details provided to our request to the  
44  
45 regulatory agencies for information was approved by the agency  
46  
47 prior to their response, and is thus accurate.  
48  
49

50  
51 Comprehensive data presentation by health regulatory agency  
52  
53 websites could improve transparency and provide better public  
54  
55 information. As we utilized every source we were able to identify  
56  
57 for each portion of the data, and established triangulation  
58  
59  
60

## Regulatory Approval of Contraceptives

1  
2  
3 between multiple sources for most data, we are confident that our  
4 data is reliable and represents all hormonal contraceptives  
5 approved during this period within Canada, the USA, and the UK.  
6  
7

8  
9 Further research could determine facilitators and barriers  
10 for drug approval process timelines in Canada. In addition to the  
11 delay in approval of contraceptives in Canada, there is a  
12 significant delay in application submissions by pharmaceutical  
13 companies to Health Canada. Analyses to define the relevant  
14 factors should be undertaken. Proactive leadership to facilitate  
15 or invite application submissions for contraceptives with  
16 significant proven population health advantages could be  
17 considered by Canadian health regulators.  
18  
19  
20  
21  
22  
23  
24  
25  
26  
27  
28  
29

30 Canadian women have access to fewer contraceptive choices,  
31 and wait longer for access, due both to delay in submission of  
32 applications for contraceptives to Health Canada, and to current  
33 Canadian federal regulatory policies and procedures which require  
34 significantly more time than in other countries. No implantable  
35 contraceptives, one of only two classes of highly effective LARC  
36 methods, have been approved for use in Canada. Availability of a  
37 variety of hormonal contraception options, including both classes  
38 of LARC methods, can reduce the number of unintended pregnancies,  
39 abortions, and neonatal complications particularly among  
40 vulnerable populations. Canadian government health systems could  
41 improve population health through addressing the regulatory  
42 barriers associated with unmet need for contraception, including  
43 the current absence of an approved contraceptive implant method,  
44  
45  
46  
47  
48  
49  
50  
51  
52  
53  
54  
55  
56  
57  
58  
59  
60

## Regulatory Approval of Contraceptives

in order to reduce the adverse consequences of unintended pregnancy among Canadians.

**REFERENCES**

1. Azzarello D, Collins J. Canadian access to hormonal contraceptive drug choices. *JOGC* 2004; 26:489-500.
2. Downing NS, Aminawing JA, Shah ND, Braunstein JB, Krumholz HM, Ross JS. Regulatory review of novel therapeutics—comparison of three regulatory agencies. *N Engl J Med* 2012; 366 (24): 2284-2293.
3. Shajarizadeh A, Hollis A. Delays in the submission of new drugs in Canada. *CMAJ* 2015; 187(1): E46- E51.
4. Trussel J. Contraceptive failure in the United States. *Contraception*. 2011 May;83(5):397-404.
5. Bahamondes L, Valeria Bahamondes M, Shulman LP. Non-contraceptive benefits of hormonal and intrauterine reversible contraceptive methods. *Hum Reprod Update*. 2015 Sep;21(5):640-51. doi: 10.1093/humupd/dmv023.
6. Seidman DS. Non-contraceptive benefits of hormonal contraception: time for renewed awareness. *Eur J Contracept Reprod Health Care*. 2011 Dec;16(6):407-8.
7. Barr NG. Managing adverse effects of hormonal contraceptives. *American Family Physician* 2010; 82(12): 1499-1506.
8. Romero L, Pazol K, Warner L, Gavin L, Moskosky S, Besera G, Loyola Briceno AC, Jatlaoui T, Barfield W; Centers for Disease Control and Prevention (CDC). Vital signs: trends in use of long-acting reversible contraception among teens aged 15-19 years seeking contraceptive services—United States, 2005-2013. *MMWR Morb Mortal Wkly Rep*. 2015 Apr 10;64(13):363-9.
9. American College of Obstetricians and Gynecologists Committee on Gynecologic Practice; Long-Acting Reversible Contraception Working Group. ACOG Committee Opinion no. 450: Increasing use of contraceptive implants and intrauterine devices to reduce unintended pregnancy. *Obstet Gynecol*. 2009 Dec;114(6):1434-8. doi: 10.1097/AOG.0b013e3181c6f965
10. Ricketts S, Klingler G, Schwalberg R. Game change in Colorado: widespread use of long-acting reversible contraceptives and rapid decline in births among young, low-

## Regulatory Approval of Contraceptives

- 1  
2  
3 income women. *Perspect Sex Reprod Health*. 2014 Sep;46(3):125-  
4 32. doi: 10.1363/46e1714.  
5  
6  
7 11. Biggs MA, Rocca CH, Brindis CD, Hirsch H, Grossman D. Did  
8 increasing use of highly effective contraception contribute  
9 to declining abortions in Iowa? *Contraception*. 2015  
10 Feb;91(2):167-73. doi: 10.1016/j.contraception.2014.10.009  
11  
12 12. Health Canada Drug Product Online Database. Ottawa (ON):  
13 Health Canada. Available at: [http://webprod5.hc-sc.gc.ca/dpd-](http://webprod5.hc-sc.gc.ca/dpd-bdpp/start-debuter.do?lang=eng)  
14 [bdpp/start-debuter.do?lang=eng](http://webprod5.hc-sc.gc.ca/dpd-bdpp/start-debuter.do?lang=eng) (Accessed 2014 Nov - 2015  
15 Feb).  
16  
17 13. Marnach ML, Long ME, Casey PM. Current issues in  
18 contraception. *Mayo Clin Proc*. 2013 Mar;88(3):295-9.  
19  
20 14. Lamvu G, Steiner MJ, Condon S, et al. Consistency between  
21 most important reasons for using contraception and current  
22 method used: the influence of health care providers.  
23 *Contraception*. 2006;63(4):399-403.  
24  
25 15. Johnson S, Pion C, Jennings V. Current methods and attitudes  
26 of women towards contraception in Europe and America. *Reprod*  
27 *Health*. 2013 Feb 5;10:7. doi: 10.1186/1742-4755-10-7.  
28  
29 16. Hatcher RA, Trussel J, Nelson AL. *Contraceptive Technology*.  
30 20th revised ed. New York, NY: Ardent Media, 2011.  
31  
32 17. Halpern V, Lopez L, Grimes DA, Stockton LL, Gallo MF.  
33 Strategies to improve adherence and acceptability of hormonal  
34 methods for contraception. *Cochrane Database Syst Rev*, 10  
35 (2013).  
36  
37 18. Wellings K, Brima N, Sadler K, Copas AJ, McDaid L, Mercer CH,  
38 McManus S, Stephenson J, Glasier A. Stopping and switching  
39 contraceptive methods: findings from Contessa, a prospective  
40 longitudinal study of women of reproductive age in England.  
41 *Contraception*. 2015 Jan;91(1):57-66.  
42  
43 19. Norman WV. Induced abortion in Canada 1974-2005: trends over  
44 the first generation with legal access. *Contraception* 2012;  
45 85:185-191.  
46  
47 20. Jones RK, Kavanaugh ML. Changes in abortion rates between  
48 2000 and 2008 and lifetime incidence of abortion. *Obstet*  
49 *Gynecol*. 2011 Jun;117(6):1358-66. doi:  
50 10.1097/AOG.0b013e31821c405e.  
51  
52 21. Wellings K, Jones KG, Mercer CH, Tanton C, Clifton S, Datta  
53 J, Copas AJ, Erens B, Gibson LJ, Macdowall W, Sonnenberg P,  
54 Phelps A, Johnson AM. The prevalence of unplanned pregnancy  
55 and associated factors in Britain: findings from the third  
56 National Survey of Sexual Attitudes and Lifestyles (Natsal-  
57  
58  
59  
60



## Regulatory Approval of Contraceptives

- 1  
2  
3 3). Lancet. 2013 Nov 30;382(9907):1807-16. doi:  
4 10.1016/S0140-6736(13)62071-1.  
5  
6  
7 22. Black A, Yang Q, Wu Wen S, Lalonde AB, Guilbert E, Fisher W.  
8 Contraceptive use among Canadian women of reproductive age:  
9 results of a national survey. J Obstet Gynaecol Can. 2009  
10 Jul;31(7):627-40  
11  
12 23. Health Canada Notice of Compliance Online Database. Ottawa  
13 (ON): Health Canada. Available at: [http://webprod5.hc-](http://webprod5.hc-sc.gc.ca/noc-ac/index-eng.jsp)  
14 [sc.gc.ca/noc-ac/index-eng.jsp](http://webprod5.hc-sc.gc.ca/noc-ac/index-eng.jsp) (Accessed 2014 Nov. - 2015  
15 Feb.).  
16  
17 24. Health Canada Drugs and Health Products Patent Register.  
18 Ottawa (ON): Health Canada Available at: [http://pr-rdb.hc-](http://pr-rdb.hc-sc.gc.ca/pr-rdb/index-eng.jsp)  
19 [sc.gc.ca/pr-rdb/index-eng.jsp](http://pr-rdb.hc-sc.gc.ca/pr-rdb/index-eng.jsp) (Accessed 2014 Nov. - 2015  
20 Feb.).  
21  
22 25. Health Canada Regulatory Review of Pharmaceuticals,  
23 Biologics, and Medical Devices. 2004 Annual Summary of  
24 Performance. Ottawa (ON): Health Canada.  
25  
26 26. Health Canada Regulatory Review of Pharmaceuticals,  
27 Biologics, and Medical Devices. 2005 Annual Summary of  
28 Performance. Ottawa (ON): Health Canada.  
29  
30 27. Health Canada Health Products and Food Products Performance  
31 Report 2006-07. Ottawa (ON): Health Canada.  
32  
33 28. Therapeutic Products Directorate. Drug Submission Performance  
34 Annual Report. Fiscal Year 2013-2014. Ottawa (ON): Health  
35 Canada.  
36  
37 29. Therapeutic Products Directorate. Drug Submission Performance  
38 Annual Report. Fiscal Year 2011-2012. Ottawa (ON): Health  
39 Canada.  
40  
41 30. FDA Approved Drug Products Database. Available at:  
42 [http://www.accessdata.fda.gov/scripts/cder/drugsatfda/index.c](http://www.accessdata.fda.gov/scripts/cder/drugsatfda/index.cfm)  
43 [fm](http://www.accessdata.fda.gov/scripts/cder/drugsatfda/index.cfm) (Accessed 2014 Nov 30).  
44  
45 31. European Medicines Agency. Available at:  
46 [http://www.ema.europa.eu/ema/index.jsp?curl=pages/includes/me](http://www.ema.europa.eu/ema/index.jsp?curl=pages/includes/medicines/medicines_landing_page.jsp&mid=)  
47 [dicines/medicines\\_landing\\_page.jsp&mid=](http://www.ema.europa.eu/ema/index.jsp?curl=pages/includes/medicines/medicines_landing_page.jsp&mid=). (Accessed 2015 Feb  
48 30)  
49  
50 32. Medicines and Healthcare Regulatory Agency. Available at:  
51 [https://www.gov.uk/government/organisations/medicines-and-](https://www.gov.uk/government/organisations/medicines-and-healthcare-products-regulatory-agency)  
52 [healthcare-products-regulatory-agency](https://www.gov.uk/government/organisations/medicines-and-healthcare-products-regulatory-agency) (Accessed 2015 Feb 30)  
53  
54 33. Bonnie Snow. Drug Information: A guide to current resources.  
55 3rd ed. New York: Neal-Schuman Publishers Inc; 2008.  
56  
57 34. MHRA Patient Information Leaflet (PIL) and Summaries of  
58 Product Characteristics (SPC). Available at:  
59  
60

## Regulatory Approval of Contraceptives

- 1  
2  
3 <http://www.mhra.gov.uk/Safetyinformation/Medicinesinformation/SPCandPILs/index.htm> (Accessed 2014 Dec. - 2015 March).  
4  
5  
6  
7 35. MHRA Public Assessment Reports. Available at:  
8 <http://www.mhra.gov.uk/Publications/PublicAssessmentReports/index.htm> (Accessed 2014 Dec. - 2015 March).  
9  
10  
11 36. Directory of Hormonal Contraceptives. International Planned  
12 Parenthood Federation. Available at:  
13 <http://contraceptive.ippf.org/search> (Accessed on 2014 Dec  
14 16)  
15  
16 37. Drug Information Handbook. 23rd Edition. American Pharmacists  
17 Association. Lexicomp Drug Reference Handbooks. 2014.  
18  
19 38. Secura GM, Madden T, McNicholas C, Mullersman J, Buckel CM,  
20 Zhao Q, Peipert JF. Provision of no-cost, long-acting  
21 contraception and teenage pregnancy. N Engl J Med. 2014 Oct  
22 2;371(14):1316-23. doi: 10.1056/NEJMoal400506.  
23  
24 39. Goldthwaite LM, Duca L, Johnson RK, Ostendorf D, Sheeder J.  
25 Adverse Birth Outcomes in Colorado: Assessing the Impact of a  
26 Statewide Initiative to Prevent Unintended Pregnancy. Am J  
27 Public Health. 2015 Sep;105(9):e60-6. doi:  
28 10.2105/AJPH.2015.302711.  
29  
30 40. Connolly A, Pietri G, Yu J, Humphreys S Association between  
31 long-acting reversible contraceptive use, teenage pregnancy,  
32 and abortion rates in England. Int J Womens Health. 2014 Nov  
33 21;6:961-74. doi: 10.2147/IJWH.S64431.  
34  
35 41. Hathaway M, Torres L, Vollett-Krech J, Wohltjen H.  
36 Increasing LARC utilization: any woman, any place, any time.  
37 Clin Obstet Gynecol. 2014 Dec;57(4):718-30. doi:  
38 10.1097/GRF.0000000000000071.  
39  
40 42. How Are Drugs Reviewed in Canada: Health Canada. Available  
41 at: [http://www.hc-sc.gc.ca/dhp-mps/prodpharma/activit/fs-  
42 fi/reviewfs\\_examenfd-eng.php](http://www.hc-sc.gc.ca/dhp-mps/prodpharma/activit/fs-fi/reviewfs_examenfd-eng.php) (Accessed 2015 Aug 30).  
43  
44  
45  
46  
47  
48  
49  
50  
51  
52  
53  
54  
55  
56  
57  
58  
59  
60

## Regulatory Approval of Contraceptives

**Table 1:** Analysis of Variance (ANOVA) results comparing approval times of different groups.

| Comparison Groups: time to approval                 | F-value (df)       | P-value |
|-----------------------------------------------------|--------------------|---------|
| Comparing Canada, UK and USA                        | $F(2, 53) = 4.63$  | 0.01    |
| Canada vs. UK only                                  | $F(1, 28) = 6.12$  | 0.02    |
| Canada vs. USA only                                 | $F(1, 40) = 4.57$  | 0.04    |
| Canada vs. [UK and USA combined]                    | $F(1, 54) = 8.27$  | 0.006   |
| Novel Drugs vs. other drugs                         | $F(1, 54) = 0.006$ | 0.94    |
| Approval Year Intervals (98-04 vs. 05-10 vs. 11-15) | $F(2, 53) = 0.11$  | 0.90    |

Confidential

## Regulatory Approval of Contraceptives

**Table 2:** Novel drug approval times stratified by country.

| Contraceptive Method                                                                | Country | Days to Approval | Approval Days Stratified | Date of Approval |
|-------------------------------------------------------------------------------------|---------|------------------|--------------------------|------------------|
| Ella®<br>(ulipristal acetate- for emergency oral contraception)                     | Canada  | 452              | 401-600                  | 2015-01-23       |
|                                                                                     | UK      | 715              | 600+                     | 2010-05-15       |
|                                                                                     | USA     | 306              | 0-310                    | 2010-08-16       |
| Implanon®<br>(etonorgestrel sub-dermal contraceptive implant)                       | Canada  | Not Yet Approved | -                        | -                |
|                                                                                     | UK      | 78               | 0-310                    | 2009-02-06       |
|                                                                                     | USA     | 1021             | 600+                     | 2006-07-17       |
| Mirena®<br>(levonorgestrel-releasing intrauterine system)                           | Canada  | 709              | 600+                     | 2000-11-24       |
|                                                                                     | UK      | 58               | 0-310                    | 1998-09-30       |
|                                                                                     | USA     | 310              | 0-310                    | 2000-12-06       |
| Natazia®<br>(combined hormonal oral contraceptive)                                  | Canada  | 775              | 600+                     | 2012-01-30       |
|                                                                                     | UK      | 361              | 311-400                  | 2008-12-08       |
|                                                                                     | USA     | 308              | 0-310                    | 2010-05-06       |
| Nuvaring®<br>(combined hormonal contraceptive vaginal ring)                         | Canada  | 554              | 401-600                  | 2004-05-11       |
|                                                                                     | UK      | 465              | 401-600                  | 2008-06-05       |
|                                                                                     | USA     | 645              | 600+                     | 2001-10-03       |
| Ortho-Evra®<br>(combined hormonal contraceptive patch)                              | Canada  | 505              | 401-600                  | 2002-08-20       |
|                                                                                     | UK      | 528              | 401-600                  | 2002-08-22       |
|                                                                                     | USA     | 334              | 311-400                  | 2001-11-20       |
| Seasonale®<br>(combined hormonal oral contraceptive-continuous three month package) | Canada  | 561              | 401-600                  | 2007-07-04       |
|                                                                                     | USA     | 396              | 311-400                  | 2003-09-05       |
| Yasmin®<br>(combined hormonal oral contraceptive)                                   | Canada  | 1926             | 600+                     | 2004-12-10       |
|                                                                                     | UK      | 212              | 0-310                    | 2000-11-23       |
|                                                                                     | USA     | 728              | 600+                     | 2001-05-11       |

## Regulatory Approval of Contraceptives

**Figure 1. Time to approval of hormonal contraception applications in Canada, the USA and the UK.**

The red dots represent the mean number of days from submission to approval for Canada, UK and USA. For each boxplot the bottom of each box is the 25th percentile, the top is the 75th percentile, and the line in the middle is the 50th percentile (median). The whiskers from the lower and upper hinges show the minimum and maximum values. The data points outside of the min and max values are the outliers.

Confidential

Regulatory Approval of Contraceptives

1  
2  
3  
4  
5  
6  
7  
8  
9  
10  
11  
12  
13  
14  
15  
16  
17  
18  
19  
20  
21  
22  
23  
24  
25  
26  
27  
28  
29  
30  
31  
32  
33  
34  
35  
36  
37  
38  
39  
40  
41  
42  
43  
44  
45  
46  
47  
48  
49  
50  
51  
52  
53  
54  
55  
56  
57  
58  
59  
60

**Figure 2: Distribution of time to approval: Number of days between submission and approval for hormonal contraceptives approved in Canada, UK, USA, 1998 - 2015.**

Confidential

## Regulatory Approval of Contraceptives

**Figure 3: Novel drugs only: Time to approval (days) for Canada, UK and USA.**

The red dots represent the mean number of days from submission to approval for Canada, UK and USA. For each boxplot the bottom of each box is the 25th percentile, the top is the 75th percentile, and the line in the middle is the 50th percentile (median). The whiskers from the lower and upper hinges show the minimum and maximum values. The data points outside of the min and max values are the outliers.

Confidential

Regulatory Approval of Contraceptives

1  
2  
3  
4  
5  
6  
7  
8  
9  
10  
11  
12  
13  
14  
15  
16  
17  
18  
19  
20  
21  
22  
23  
24  
25  
26  
27  
28  
29  
30  
31  
32  
33  
34  
35  
36  
37  
38  
39  
40  
41  
42  
43  
44  
45  
46  
47  
48  
49  
50  
51  
52  
53  
54  
55  
56  
57  
58  
59  
60

**Figure 4: Mean time to approval (days) for Canada, UK and USA for three cohorts of approval years (1998–2004, 2005–2010, and 2011–2015) .**

Confidential



1  
2  
3  
4  
5  
6  
7  
8  
9  
10  
11  
12  
13  
14  
15  
16  
17  
18  
19  
20  
21  
22  
23  
24  
25  
26  
27  
28  
29  
30  
31  
32  
33  
34  
35  
36  
37  
38  
39  
40  
41  
42  
43  
44  
45  
46  
47  
48  
49

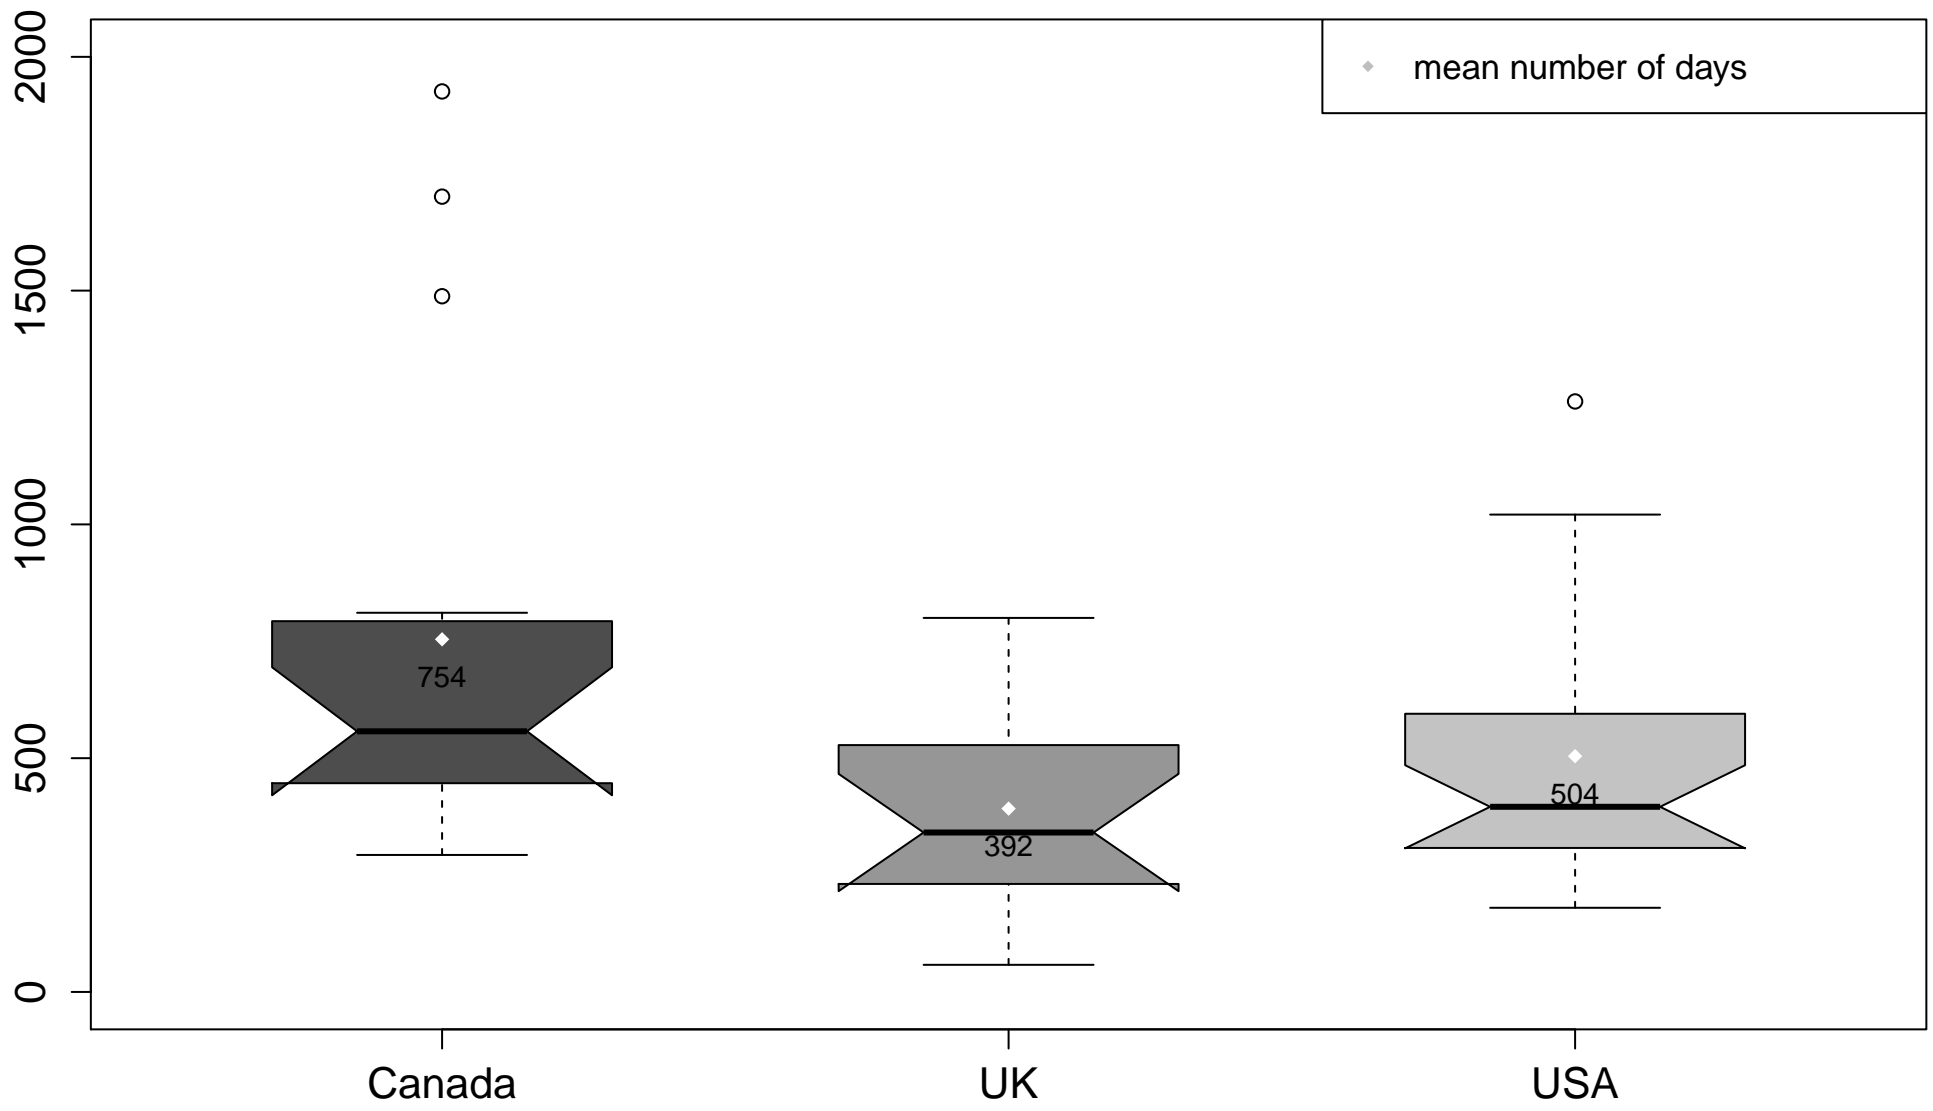

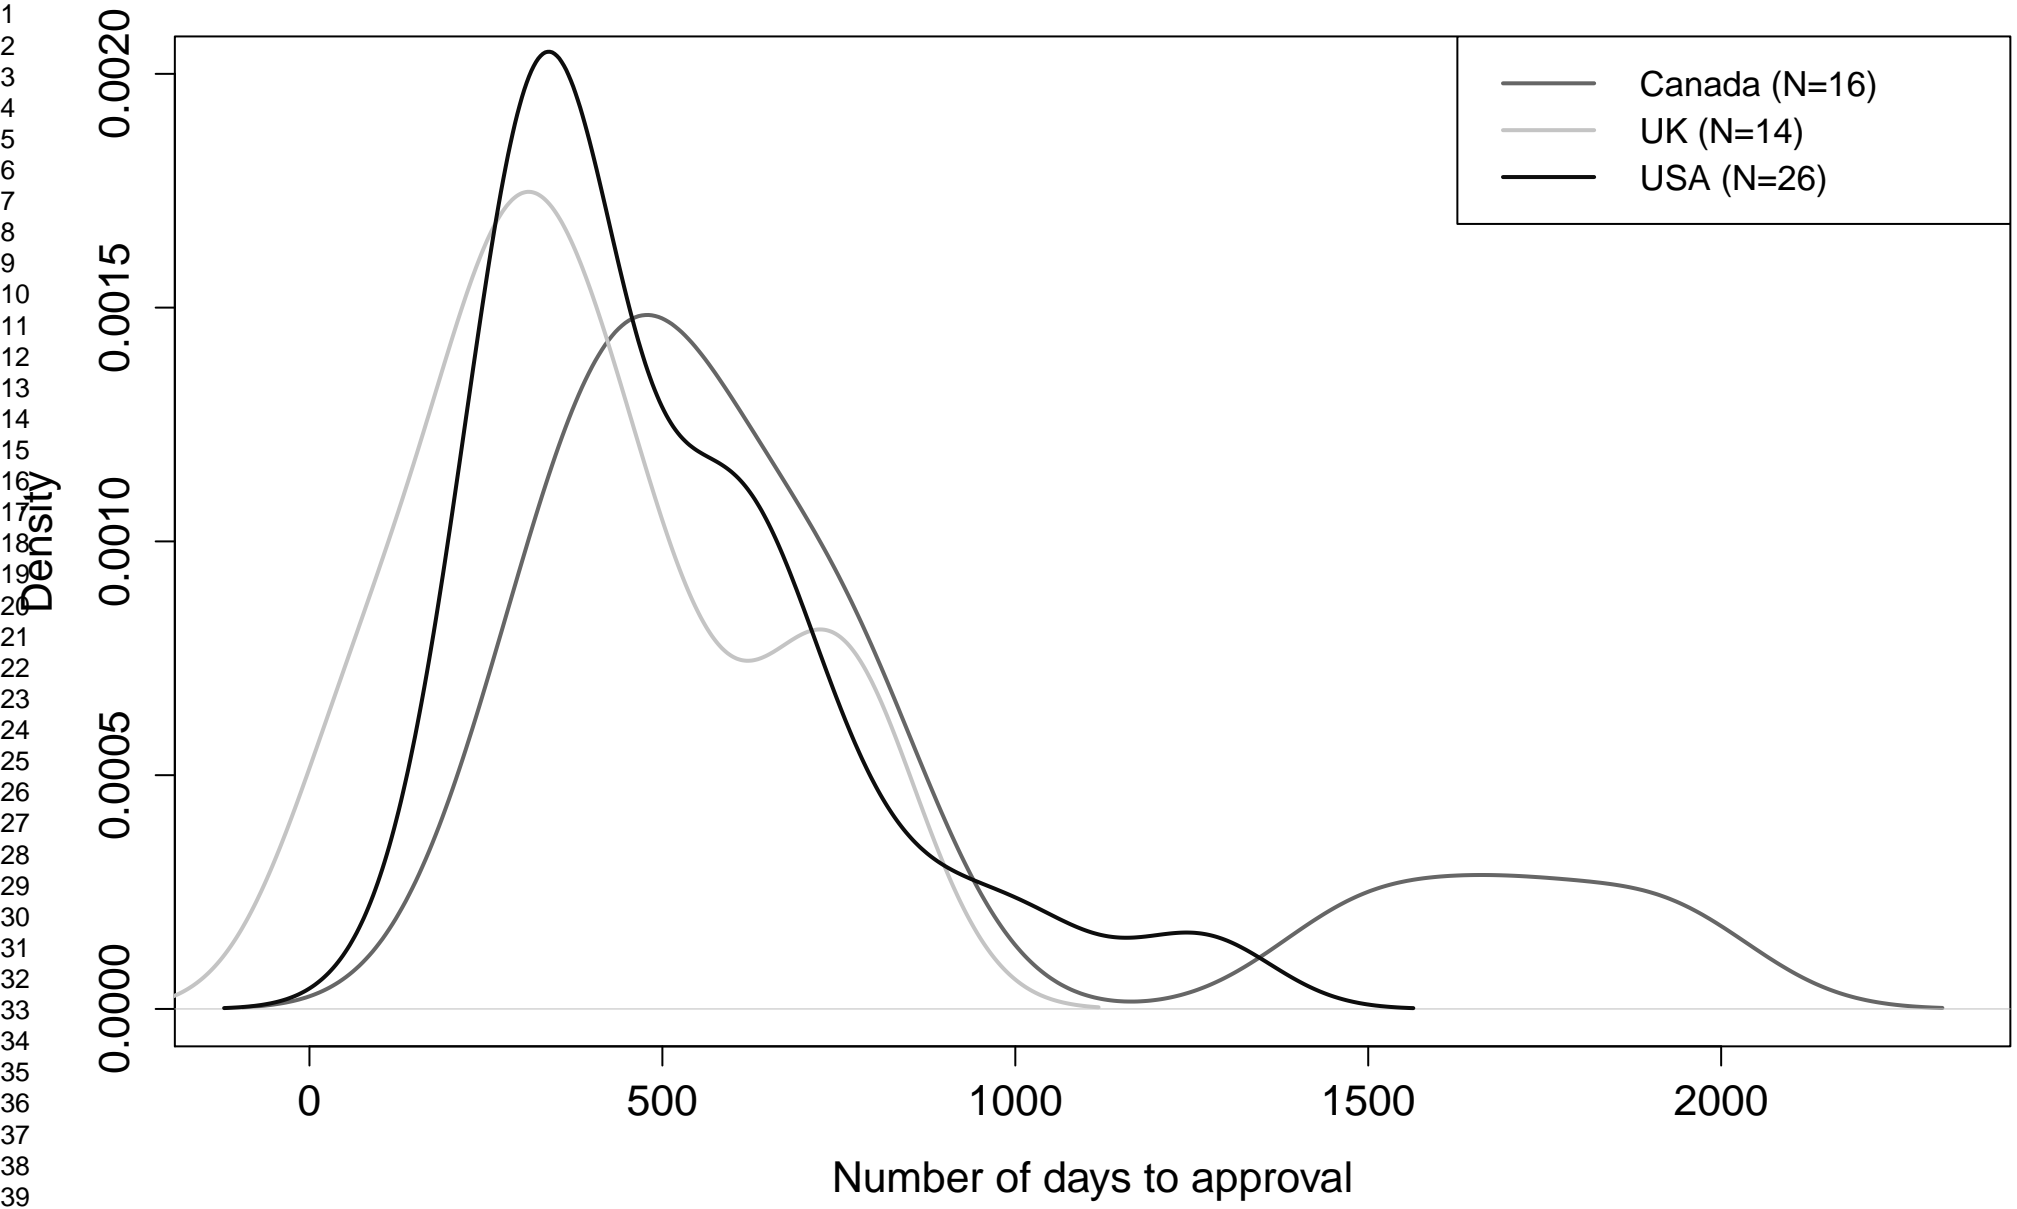

1  
2  
3  
4  
5  
6  
7  
8  
9  
10  
11  
12  
13  
14  
15  
16  
17  
18  
19  
20  
21  
22  
23  
24  
25  
26  
27  
28  
29  
30  
31  
32  
33  
34  
35  
36  
37  
38  
39  
40  
41  
42  
43  
44  
45  
46  
47  
48  
49

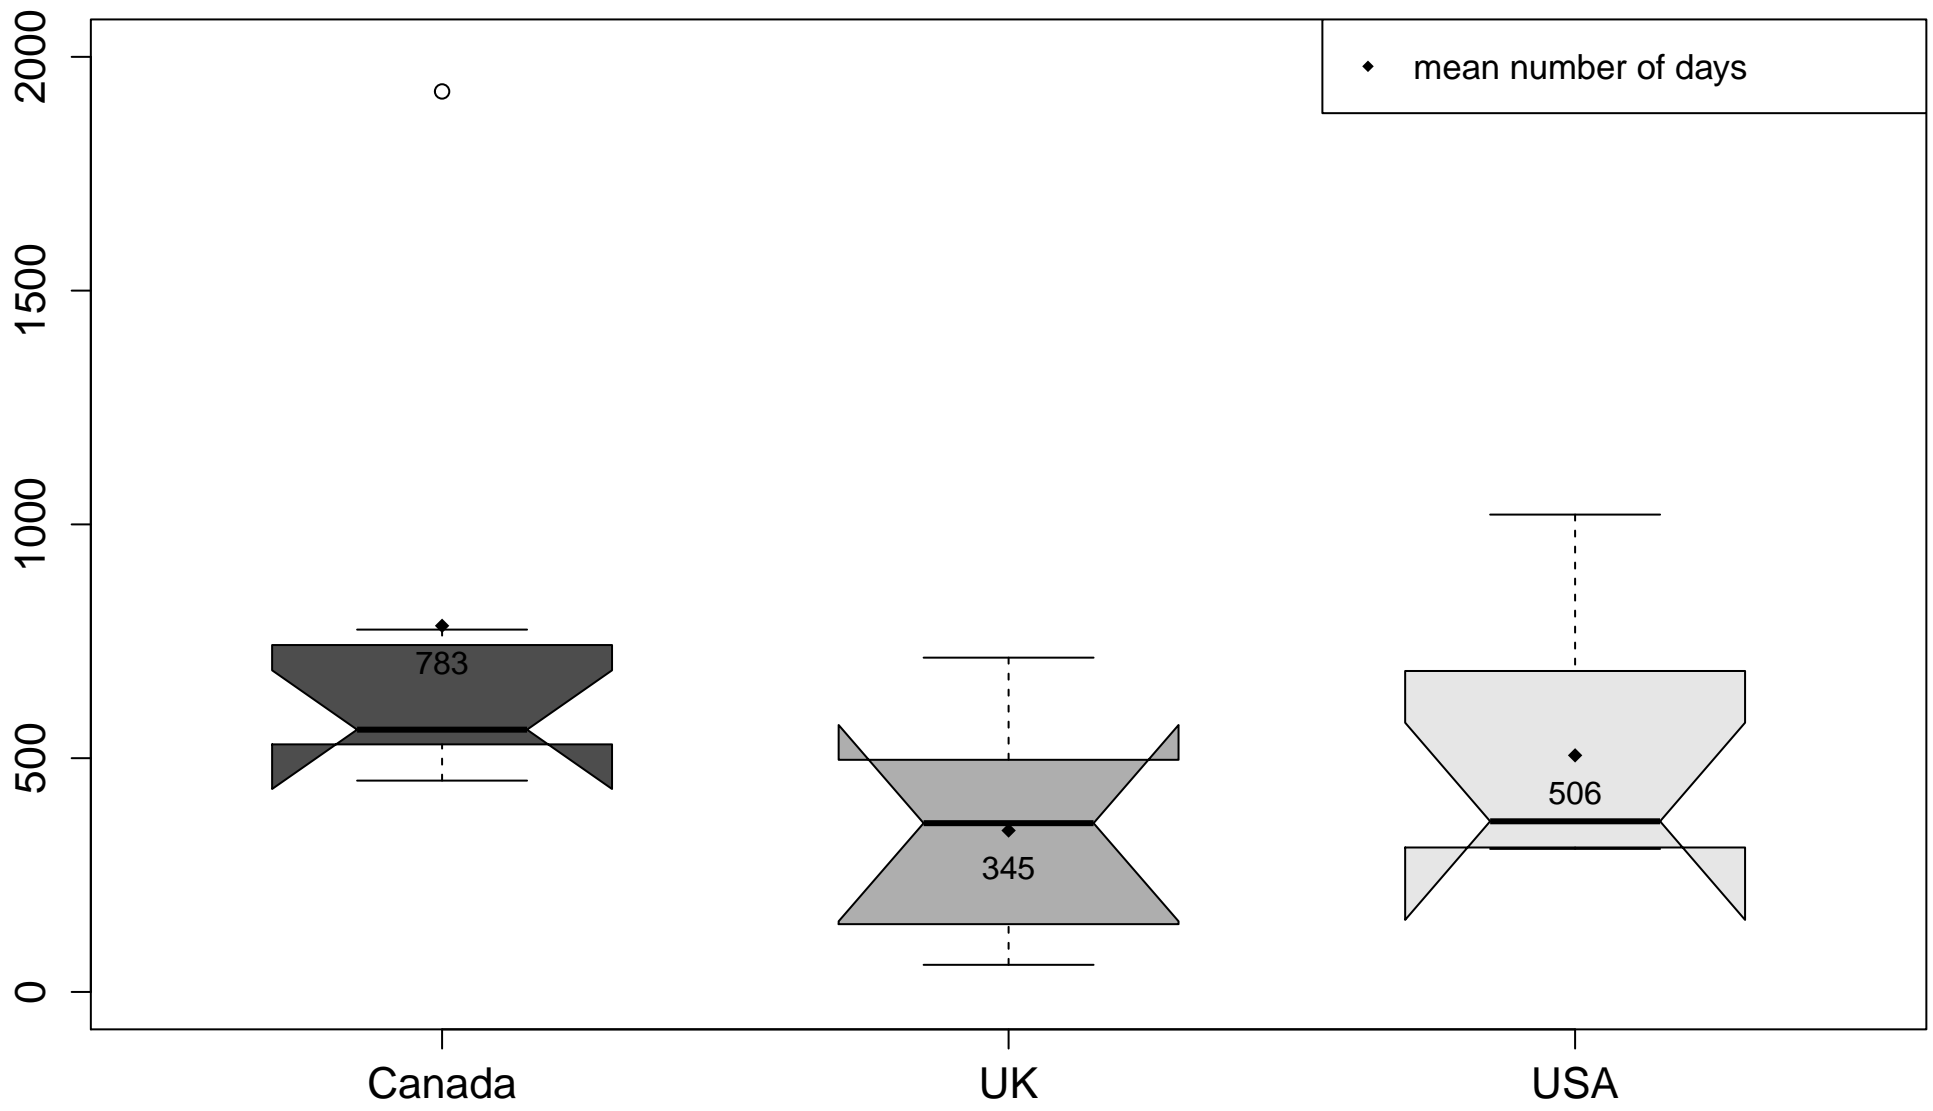

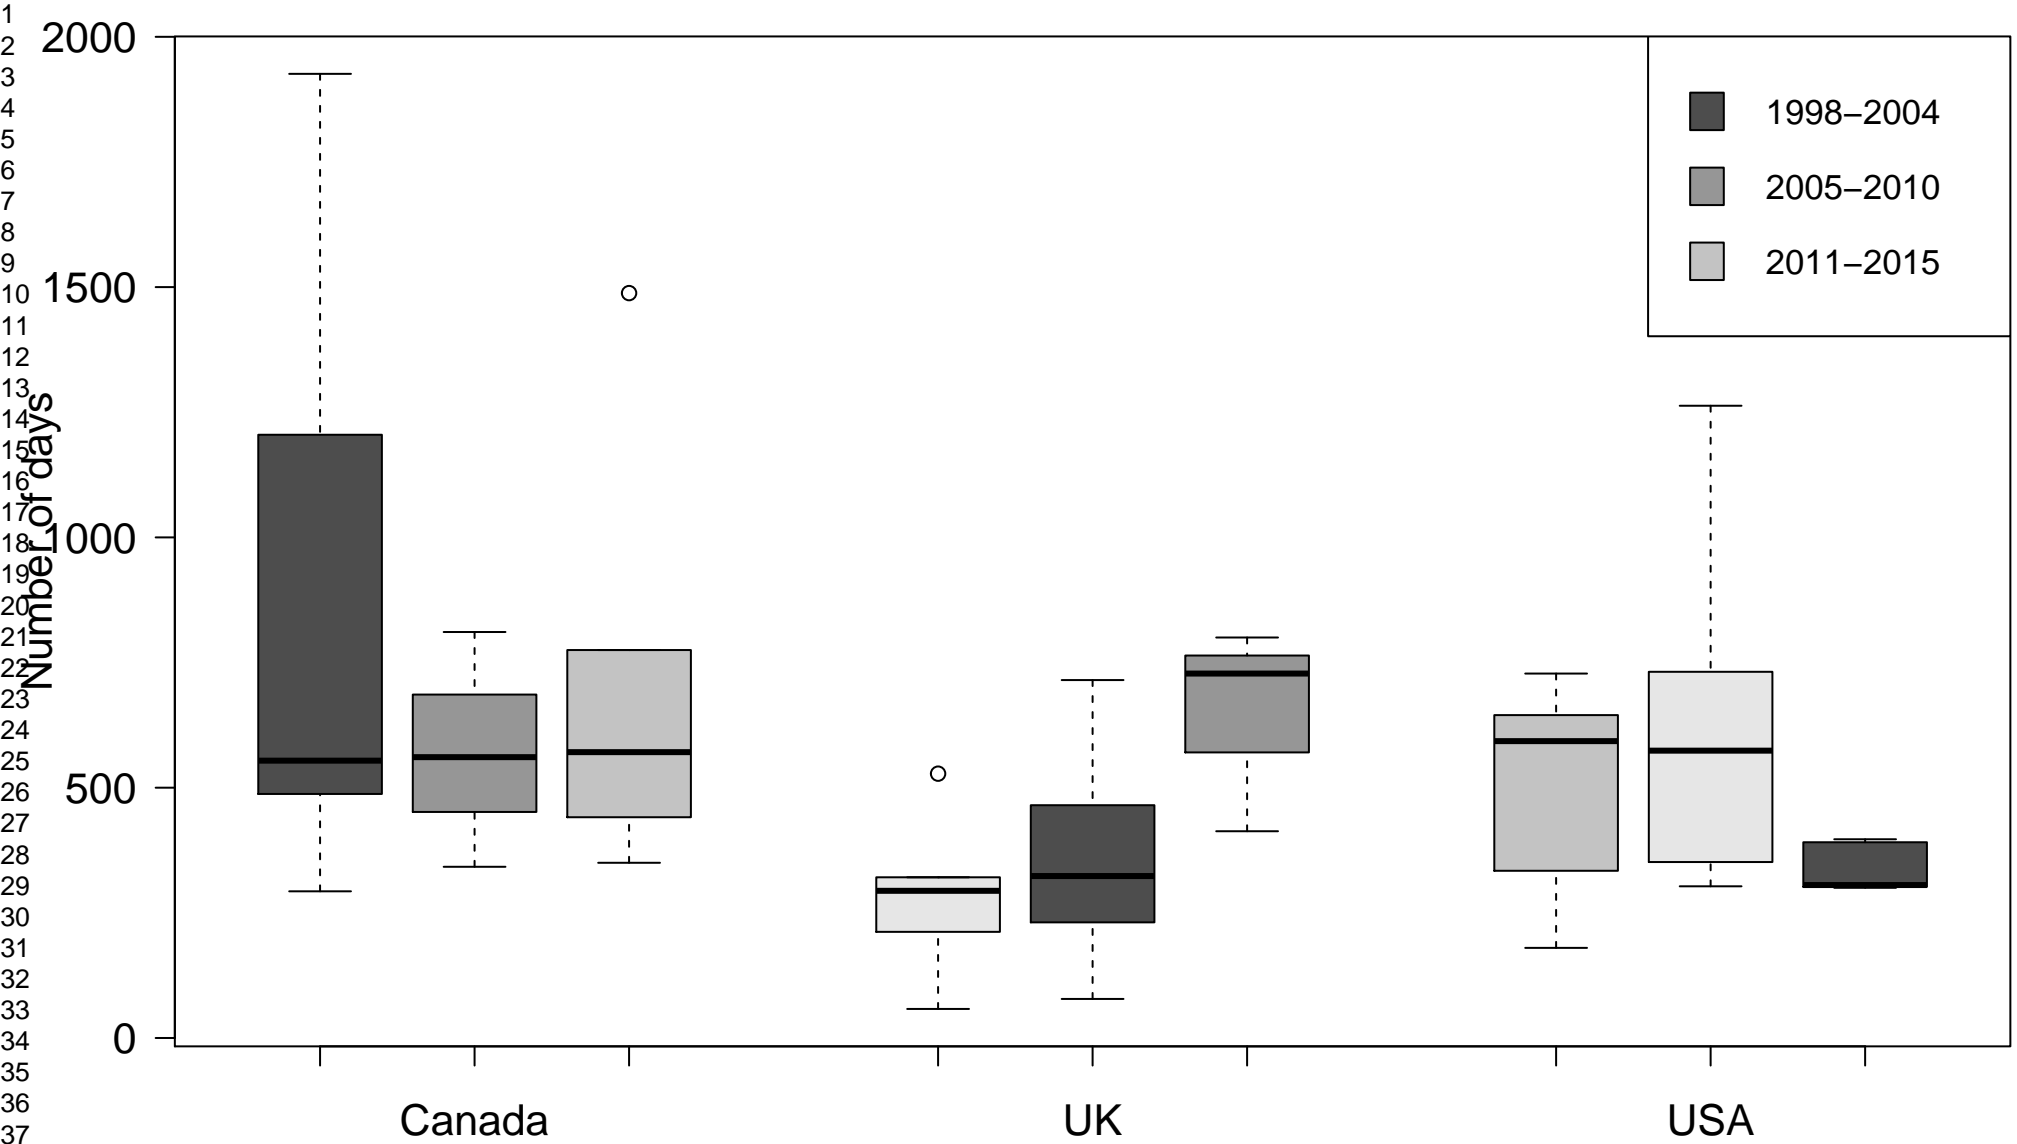

Supplement: supp_4.4.E654_2016-0017-Original_submission.pdf [file supp_4.4.E654_2016-0017-Original_submission.pdf]
